# Supplementary figures and images for: Carboxylesterase-1 Assisted Targeting of HDAC Inhibitors to Mononuclear Myeloid Cells in Inflammatory Bowel Disease
Source: PubMed Central journal article supplement — J Crohns Colitis. 2021 Oct 11;16(4):668–81. doi: 10.1093/ecco-jcc/jjab176 (PMC9089418; doi:10.1093/ecco-jcc/jjab176), 2021-10-11

A

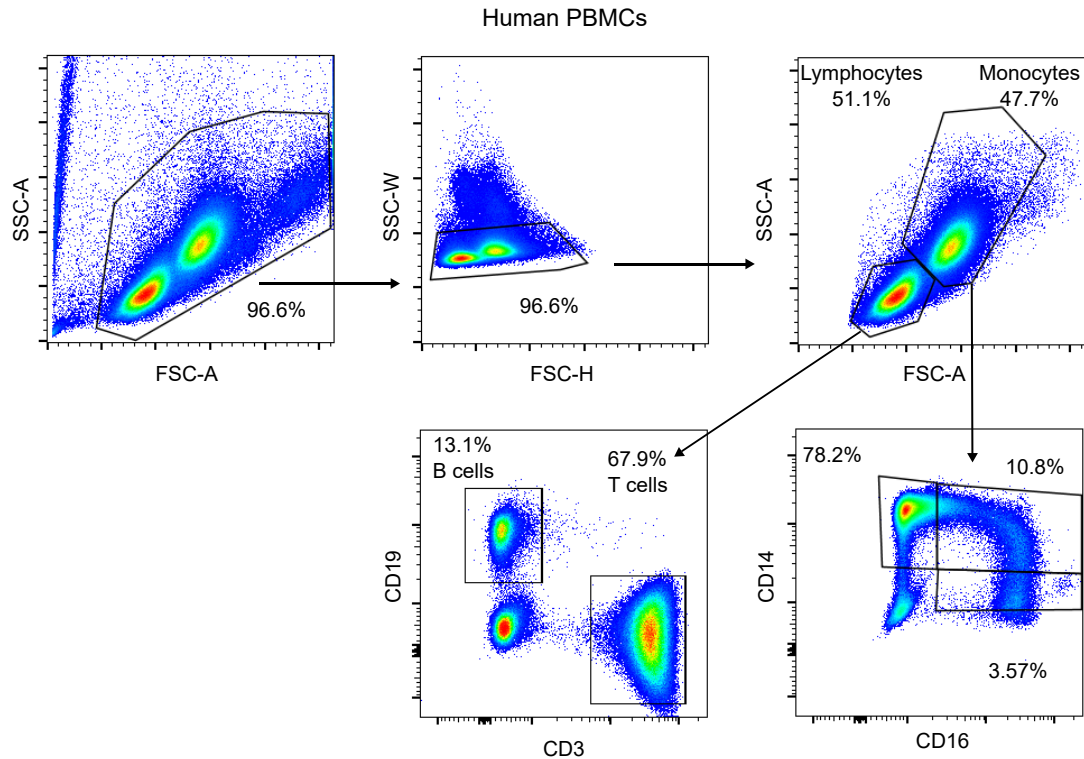

**A**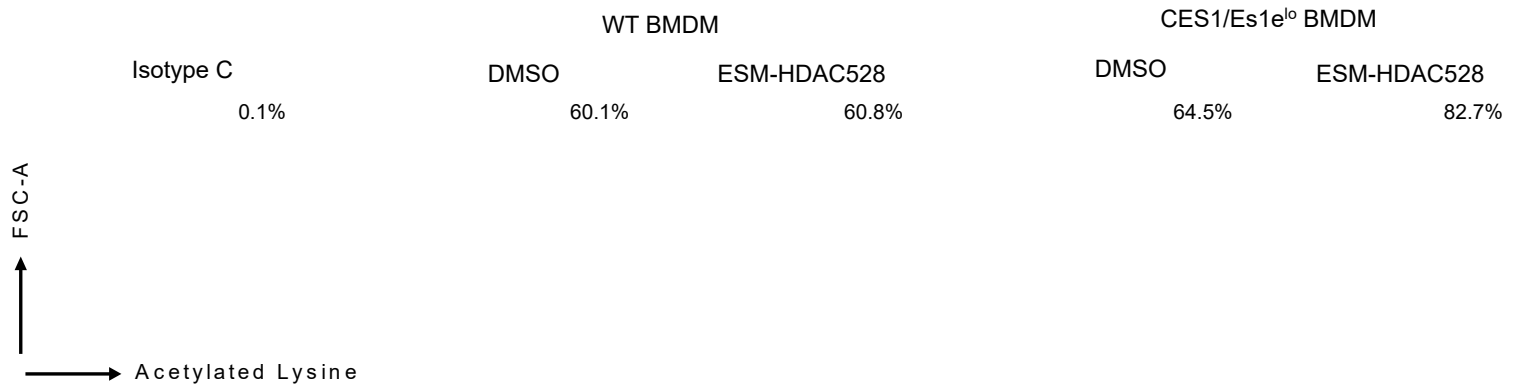**B**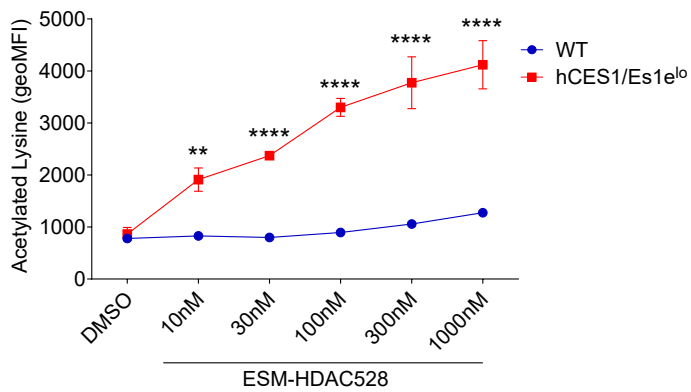**C**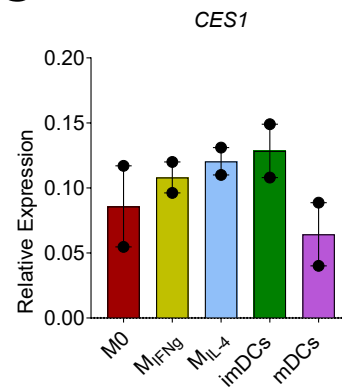**D**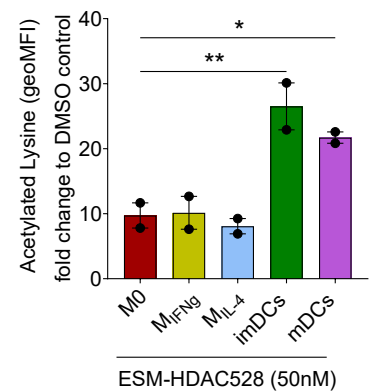**E**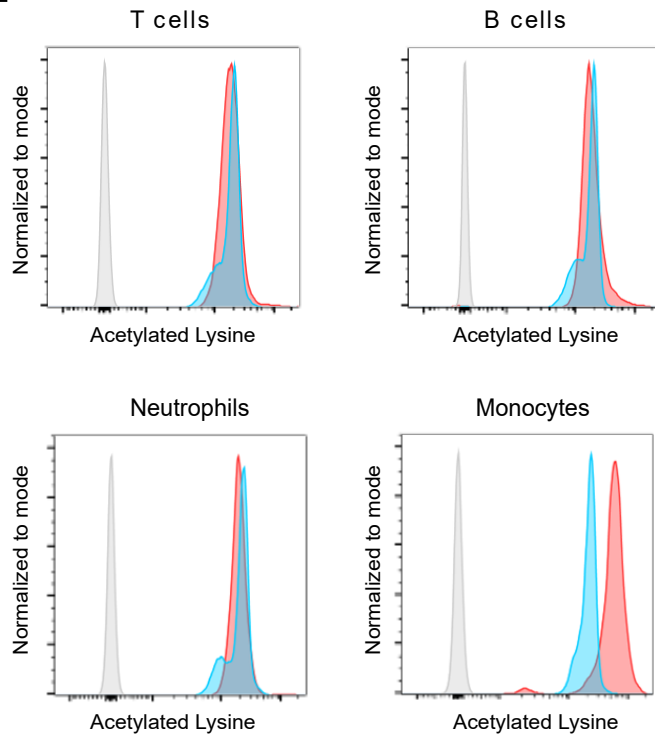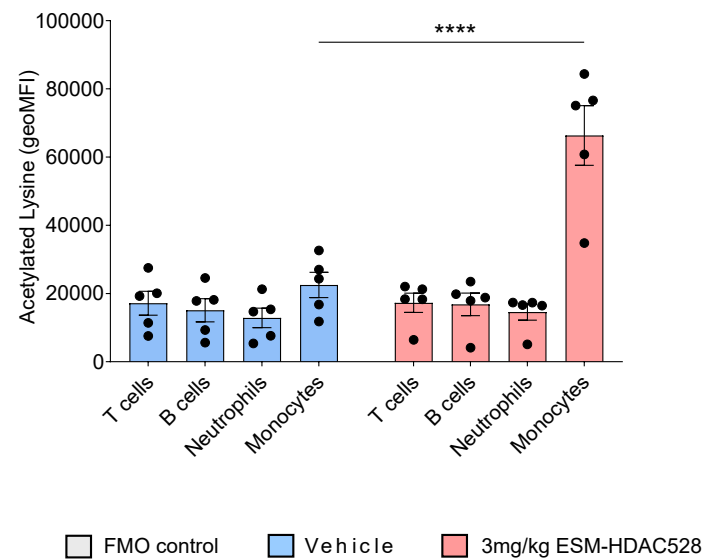

A

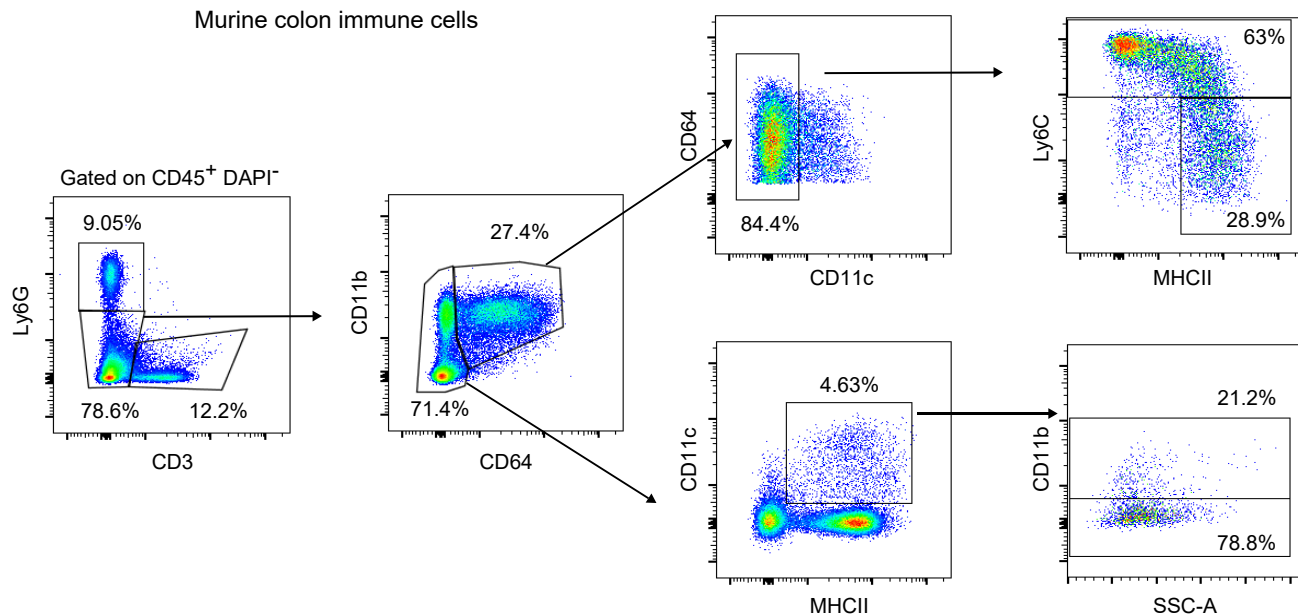

B

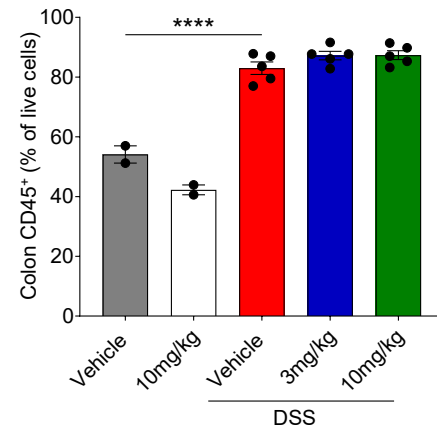

Supplement: jjab176_suppl_supplementary_figures.pdf [file jjab176_suppl_supplementary_figures.pdf]
